# Supplementary material
Source: Springer Nature journal article supplement (https://www.springermedizin.de/resource/supplementary/12943_2013_1286_MOESM9_ESM.pdf/9553148)

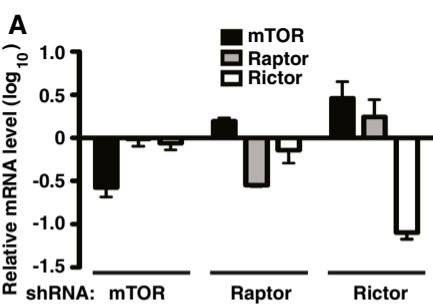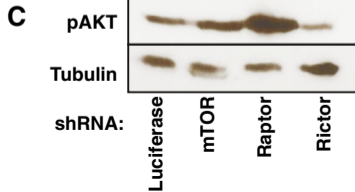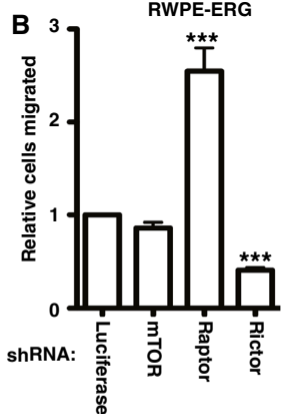

Supplement: MOESM9 [file 9553148]
